# Supplementary material
Source: PubMed Central journal article supplement (PMC4492458)
Supplement: NIHMS685975-supplement-BC_Spectral_SI.pdf [file NIHMS685975-supplement-BC_Spectral_SI.pdf]

LC/MS (ESI) of  
**10a and 10b**

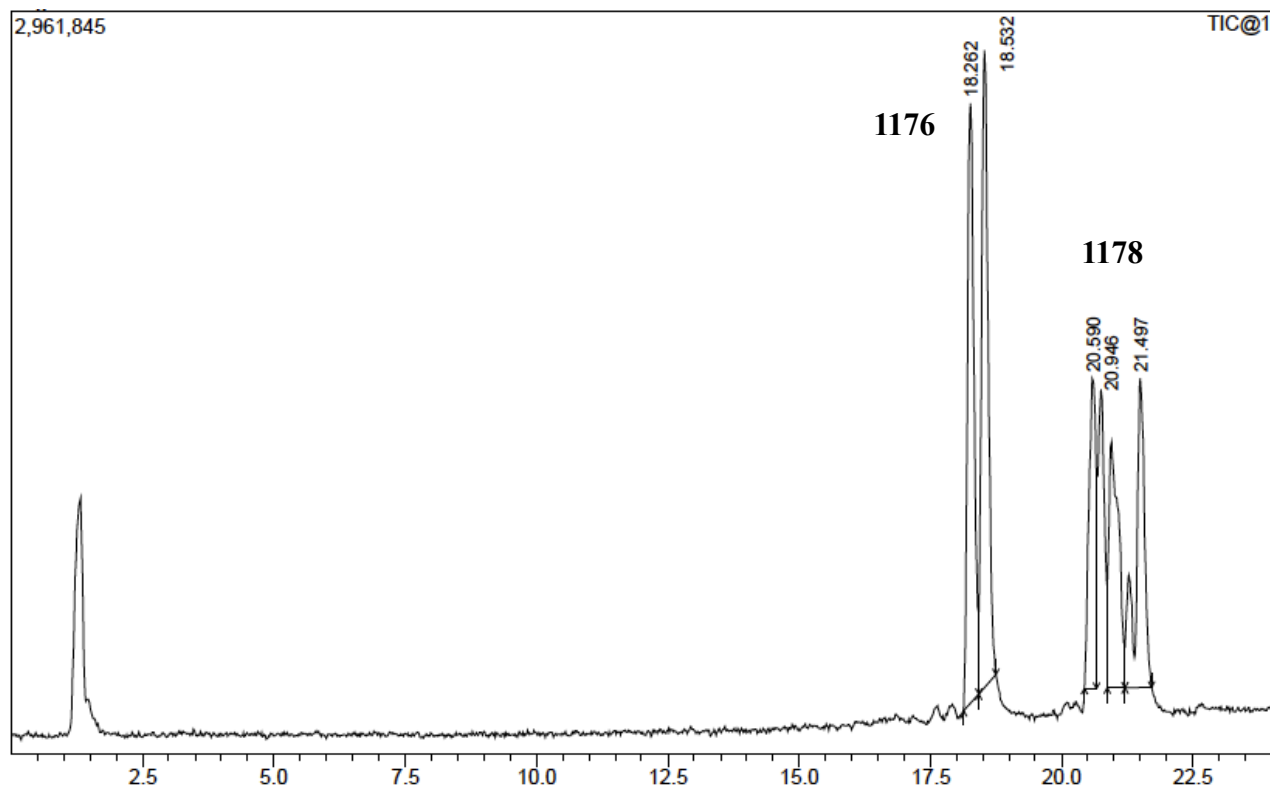

Spectrum Mode: Averaged 18.1 -18.9 min

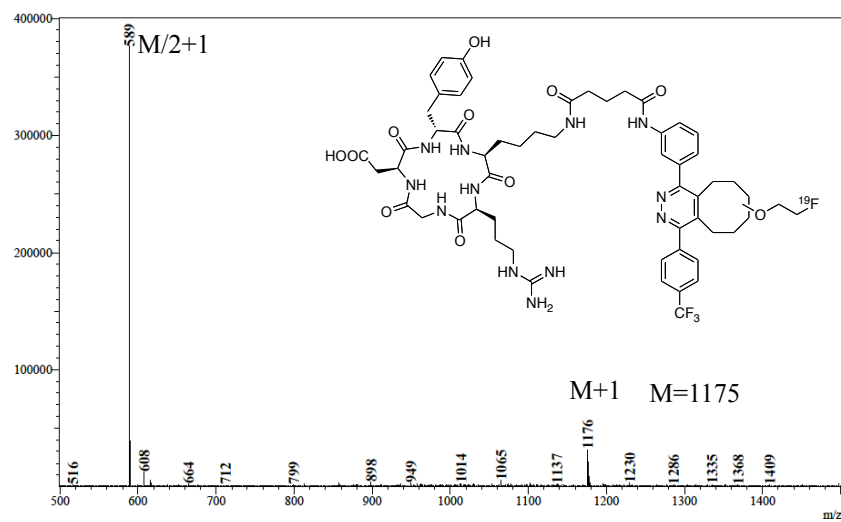

Spectrum Mode: Averaged 20.4 -21.9 min

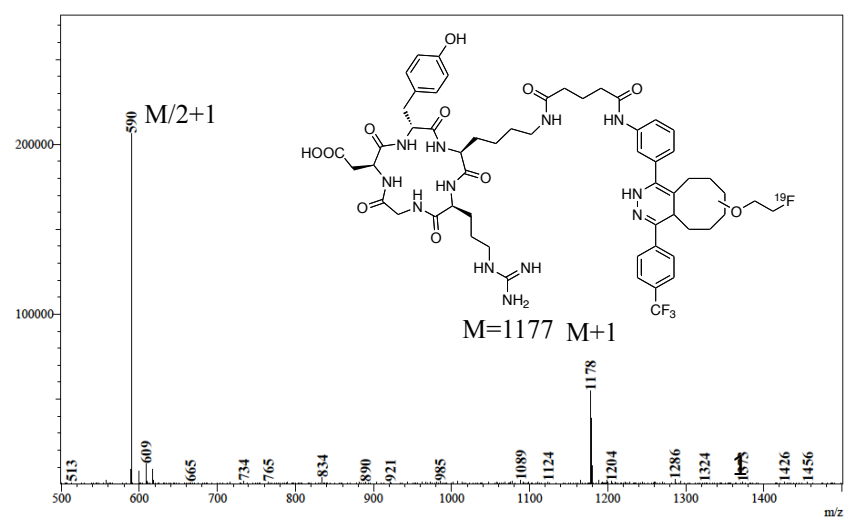

$^1\text{H}$  NMR of **6** (400 MHz, DMSO- $\text{d}_6$ )

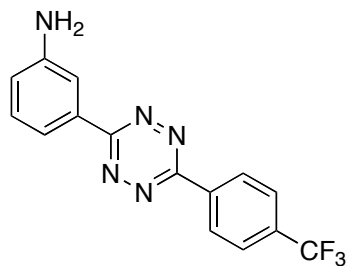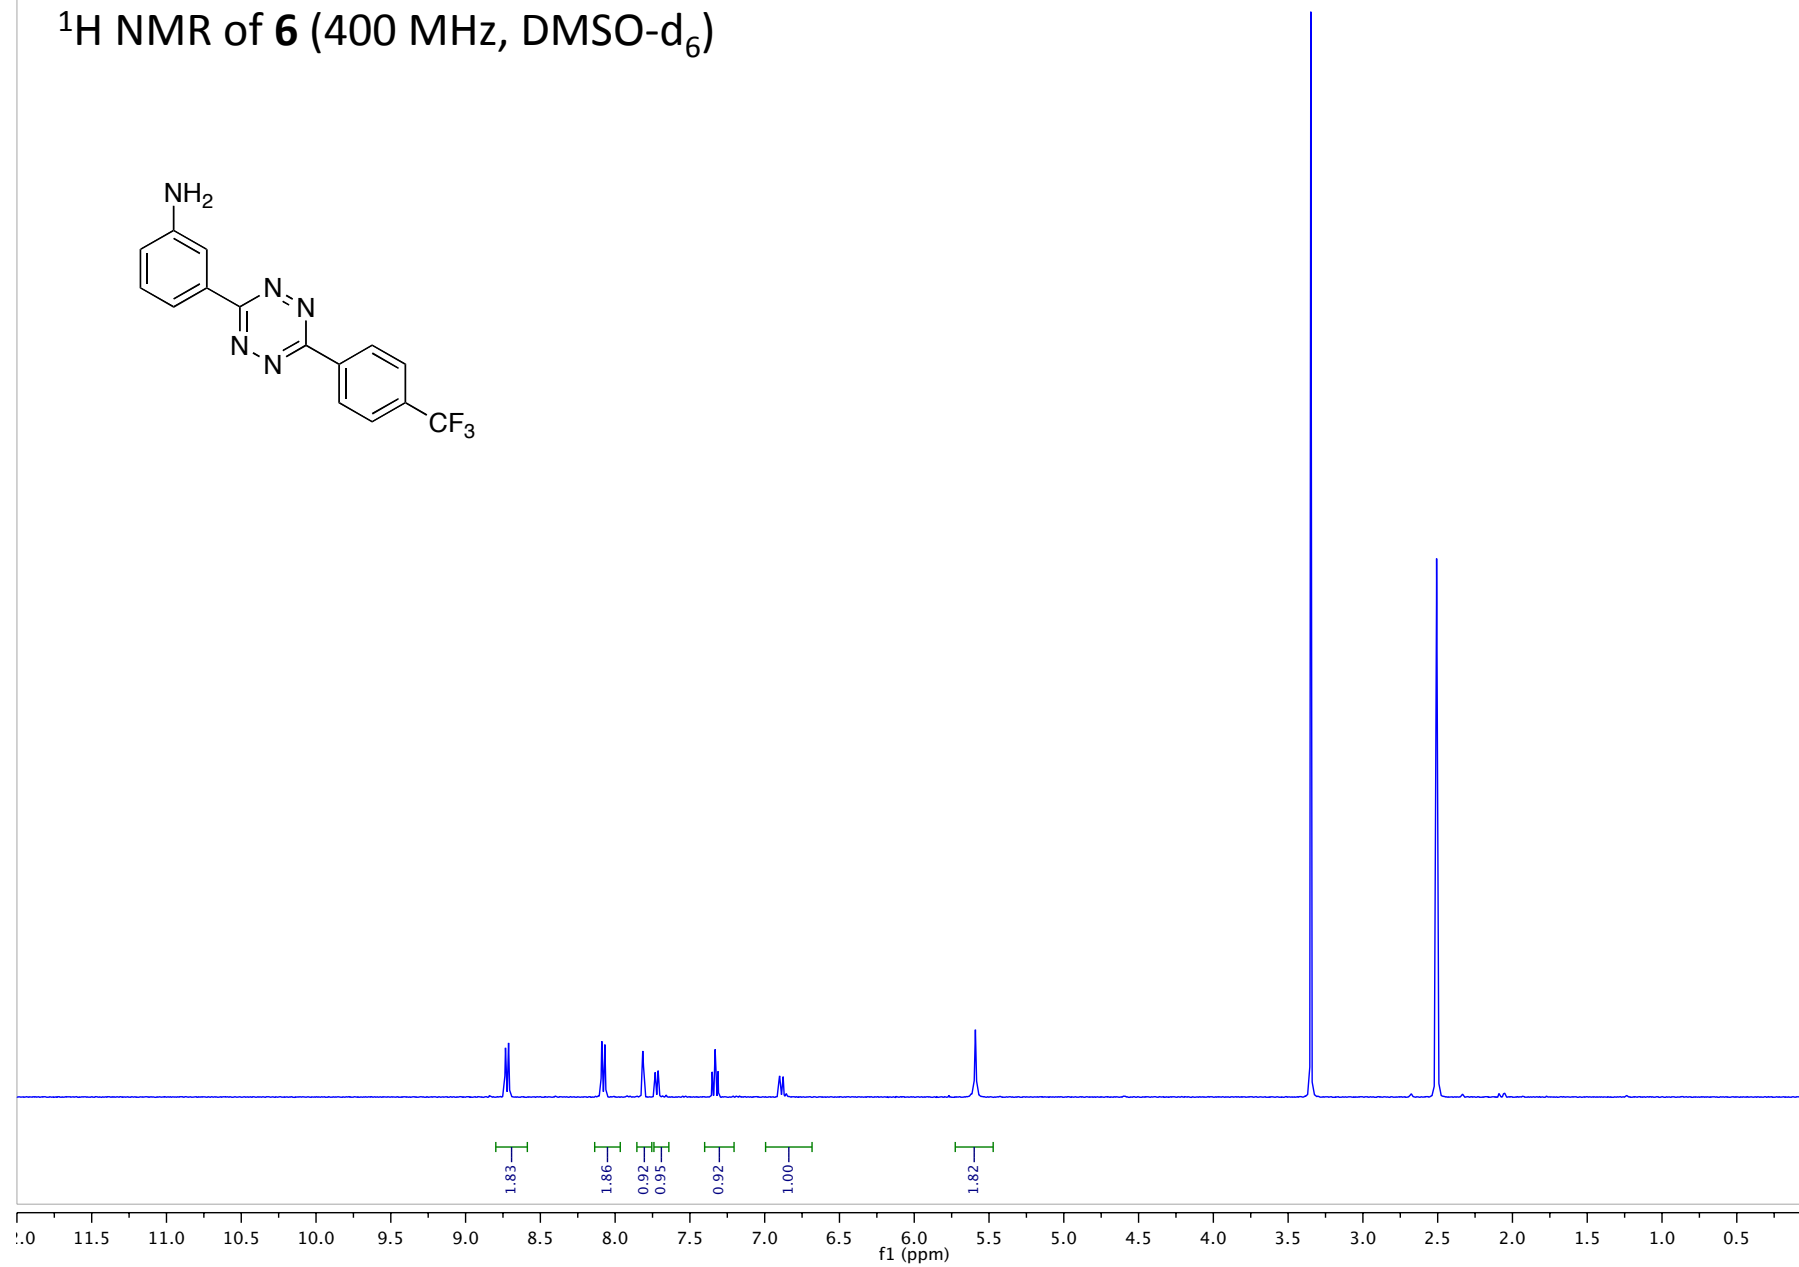

<sup>13</sup>C NMR of **6** (101 MHz, DMSO-d<sub>6</sub>)

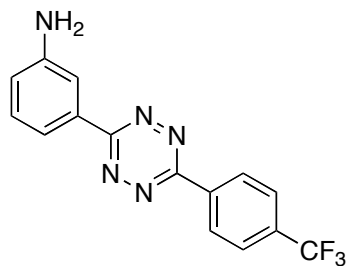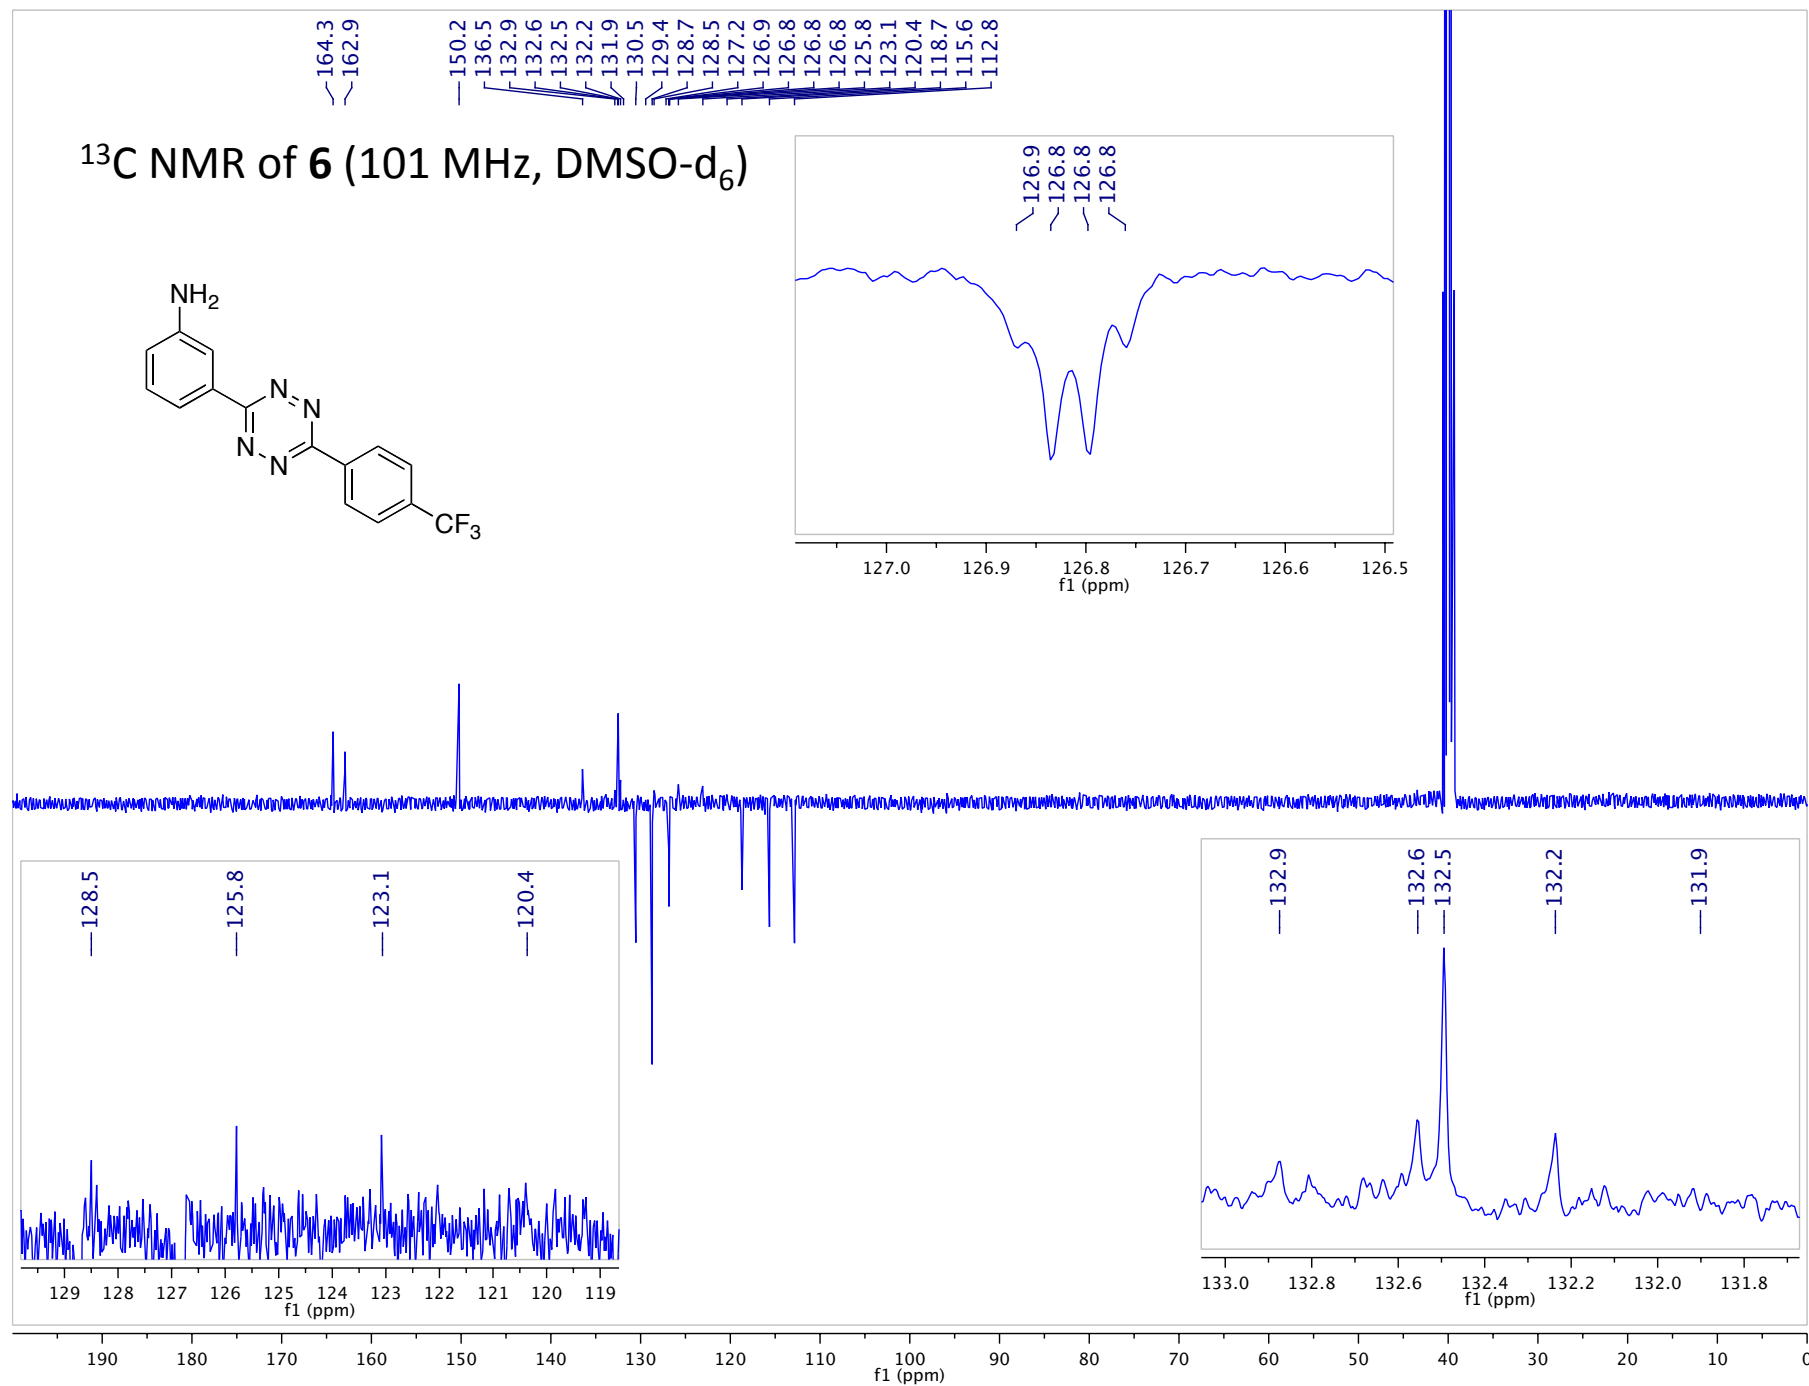

$^1\text{H}$  NMR (400 MHz,  $\text{DMSO-d}_6$ )

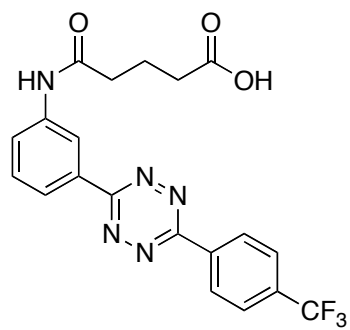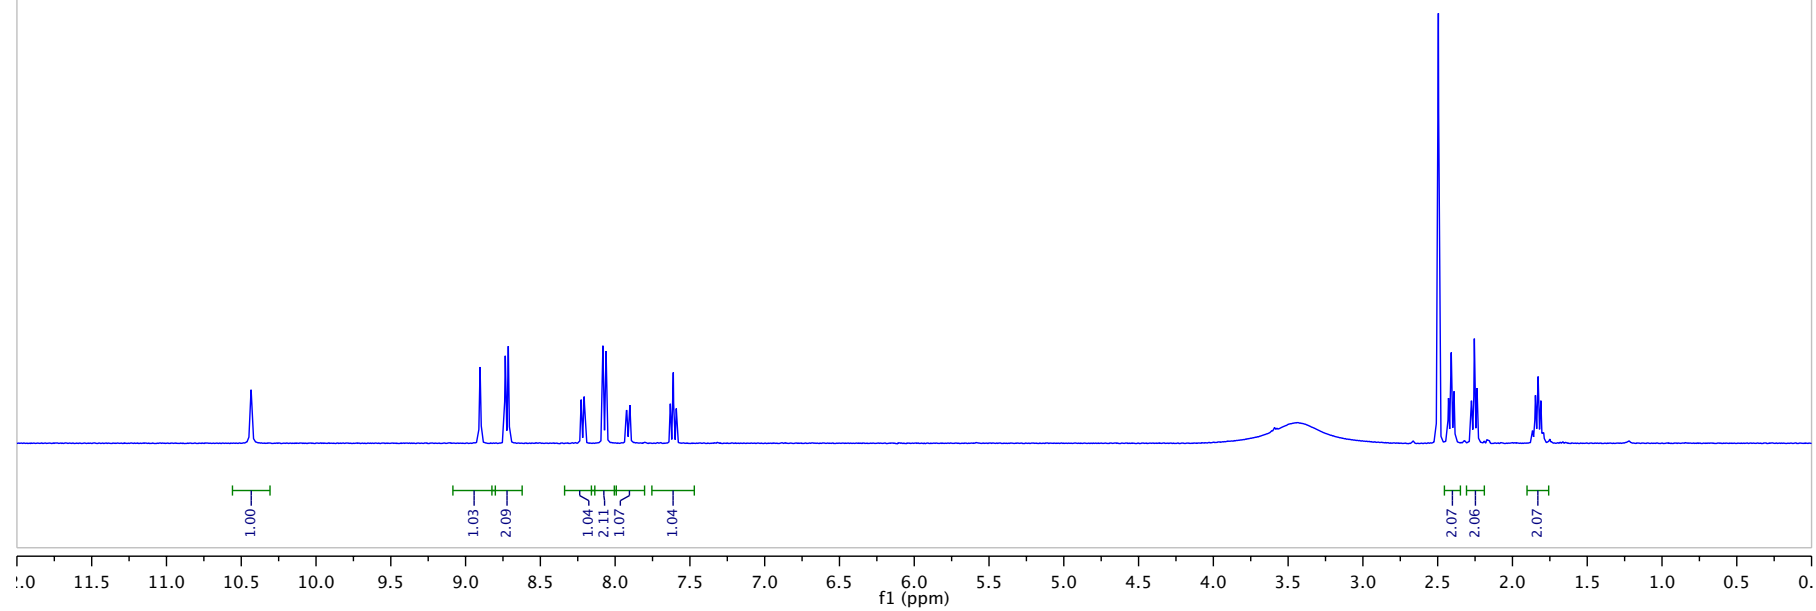

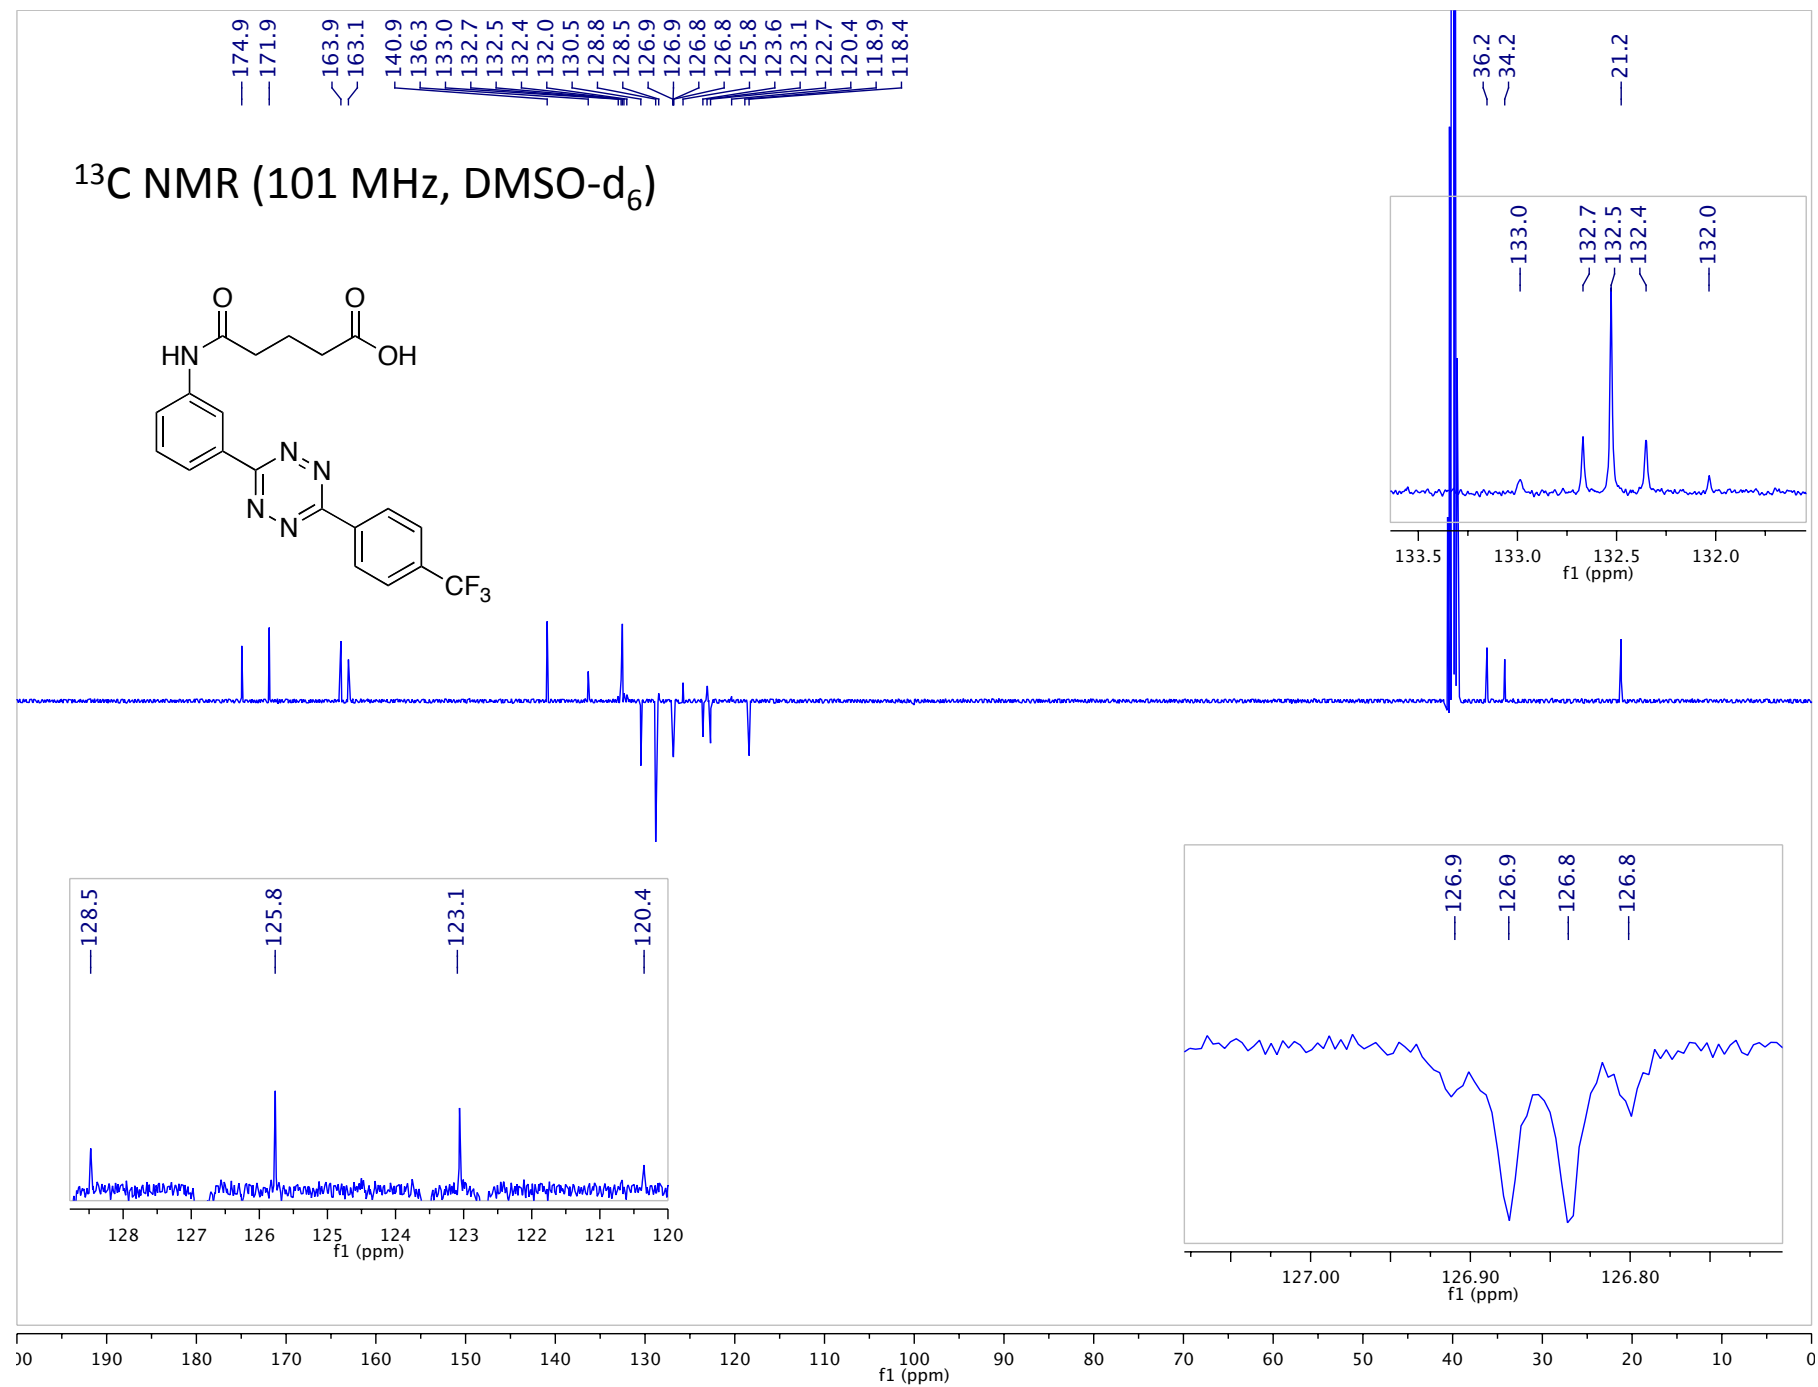

$^1\text{H}$  NMR (400 MHz, DMSO- $\text{d}_6$ )

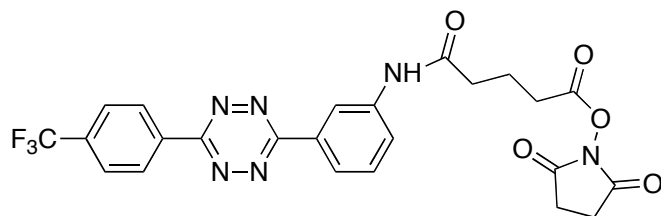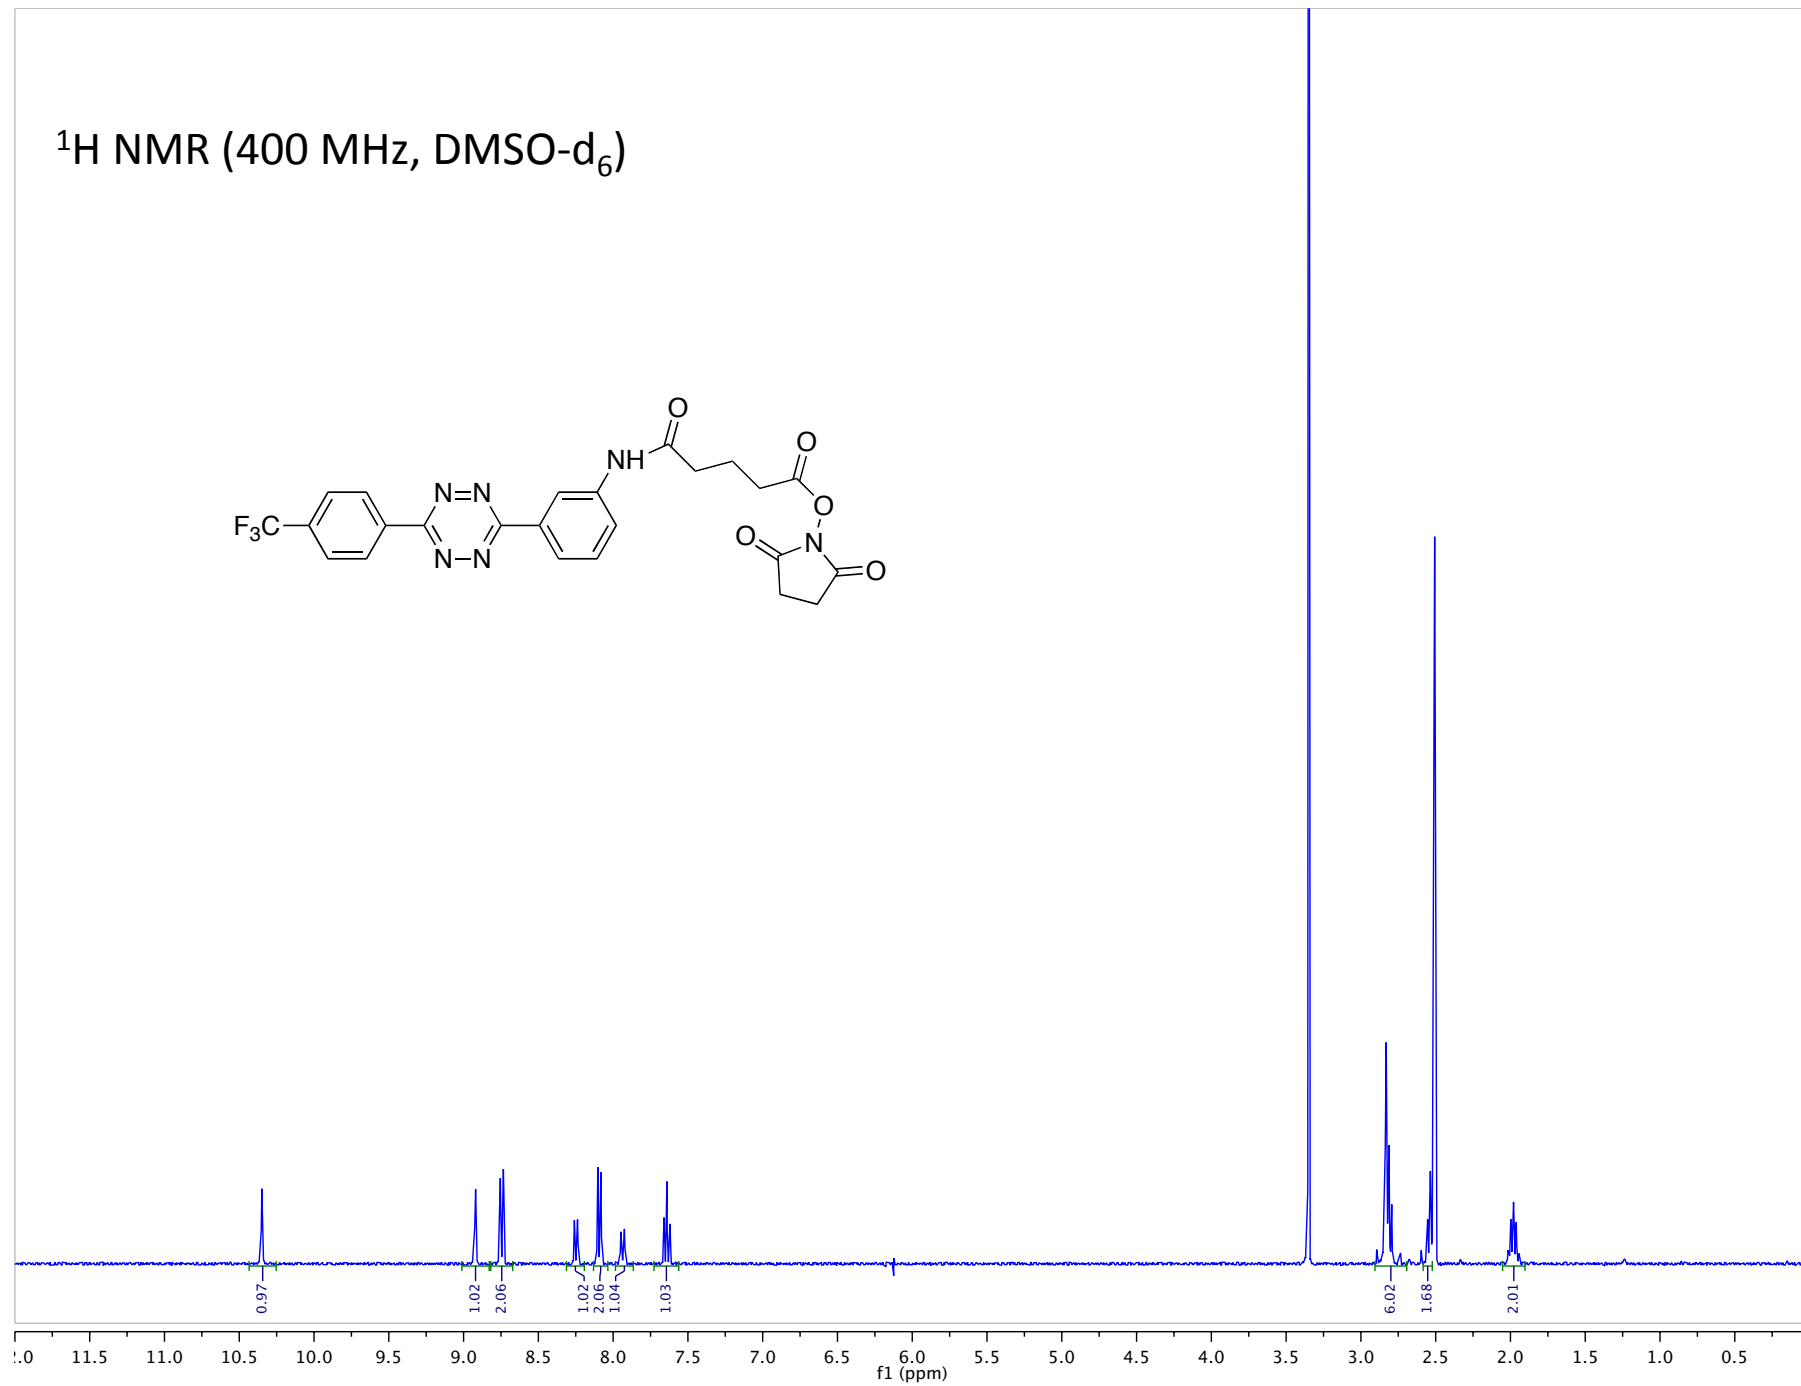

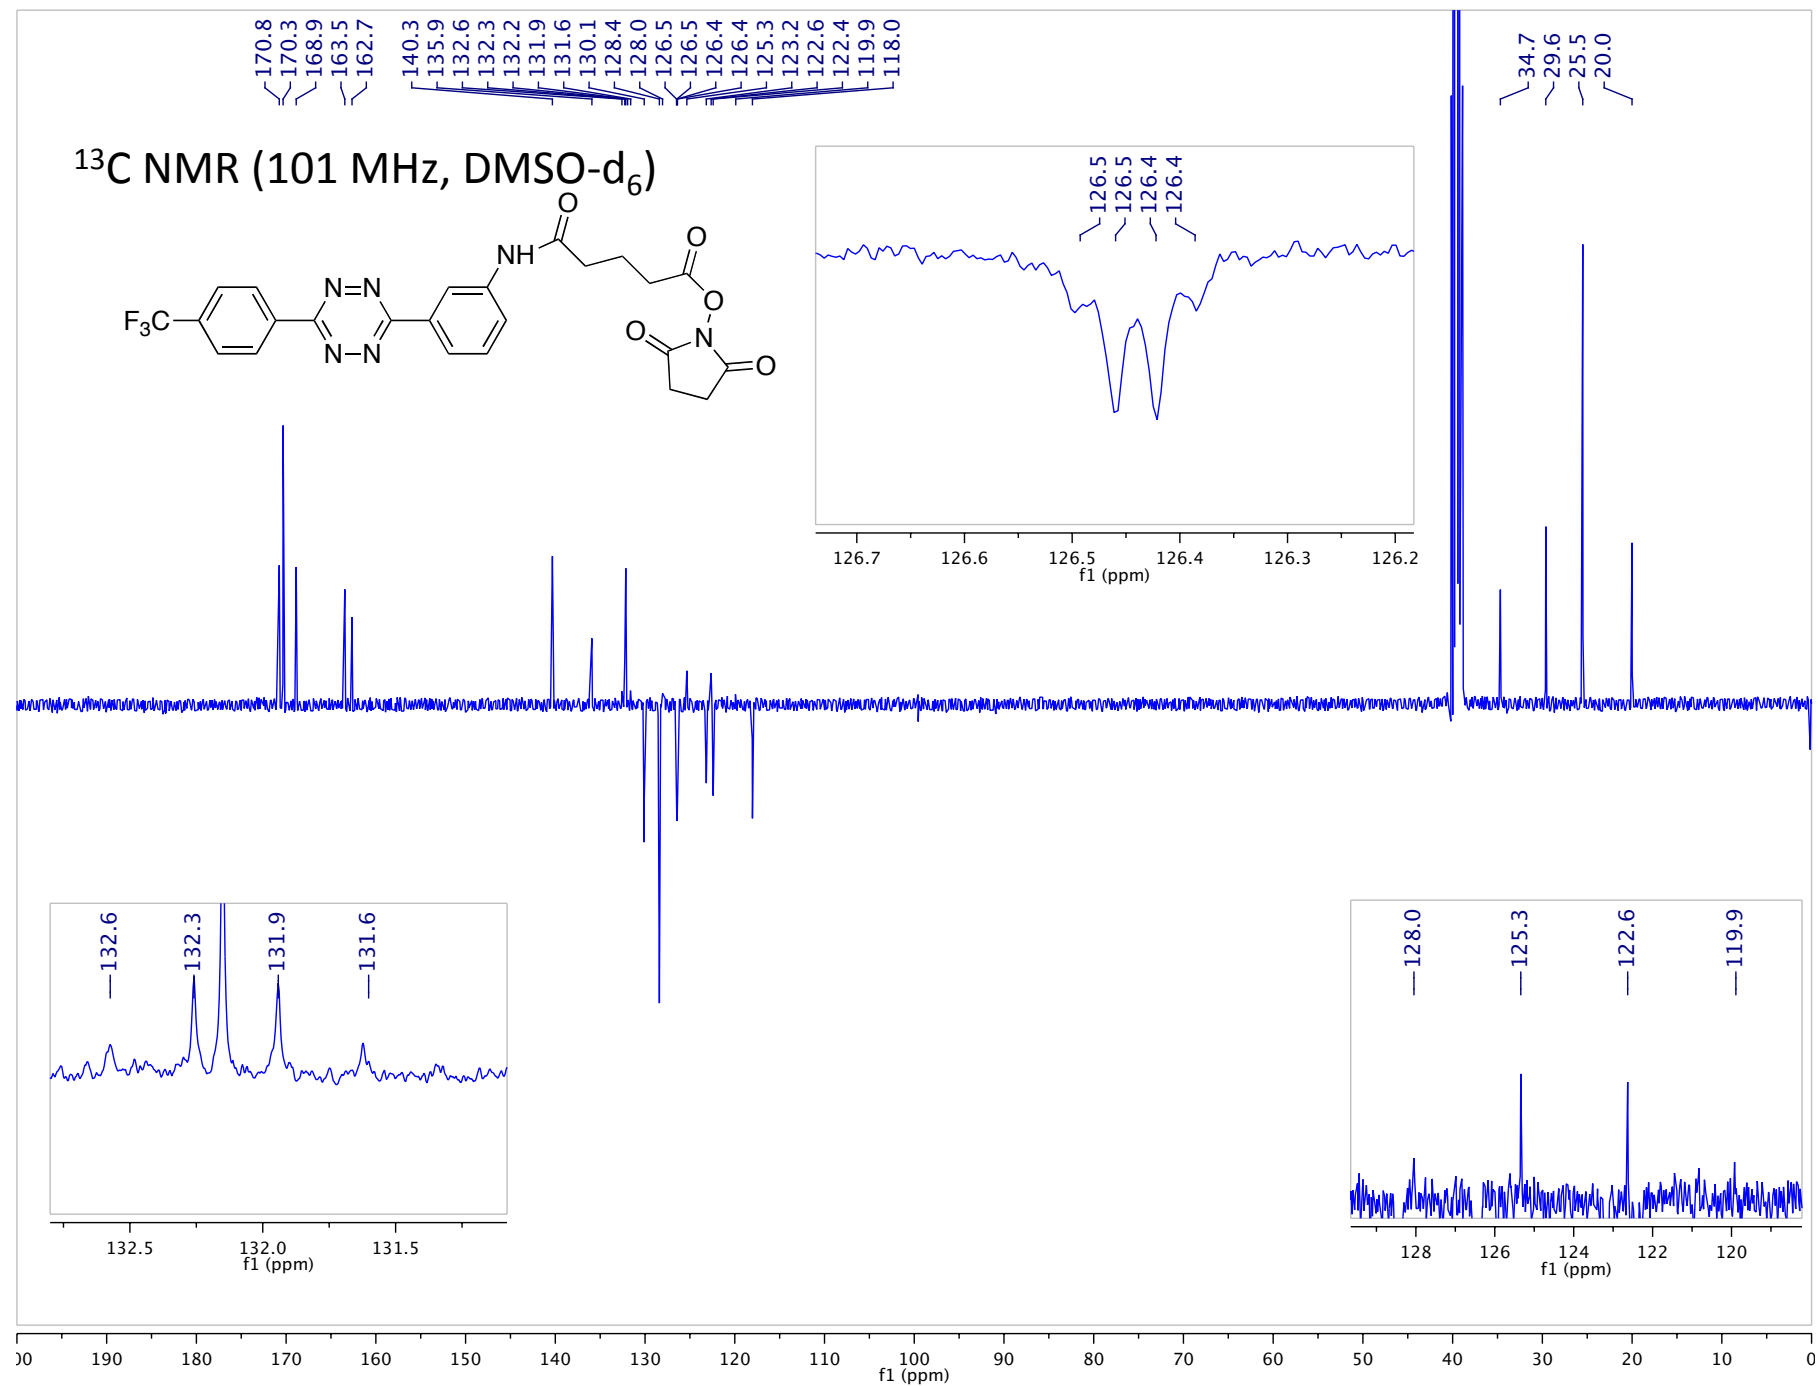

$^1\text{H}$  NMR of **8** (400 MHz,  $\text{CDCl}_3$ )

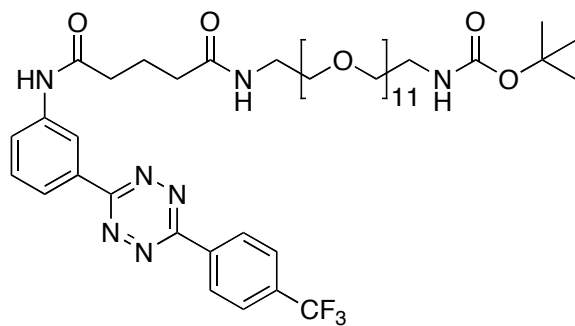

✱ Grease

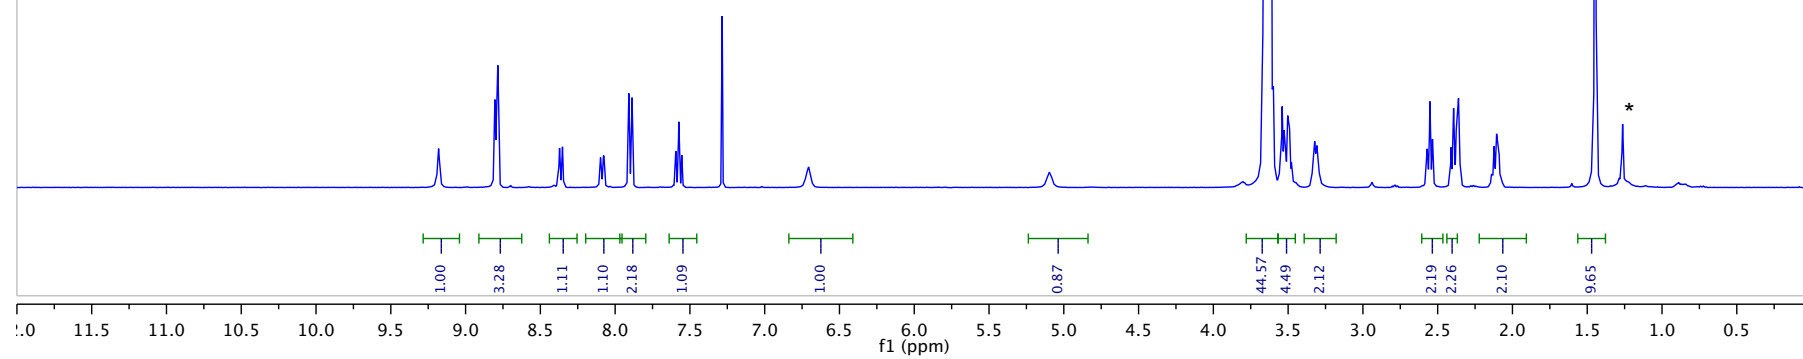

<sup>13</sup>C NMR of **8** (101 MHz, CDCl<sub>3</sub>)

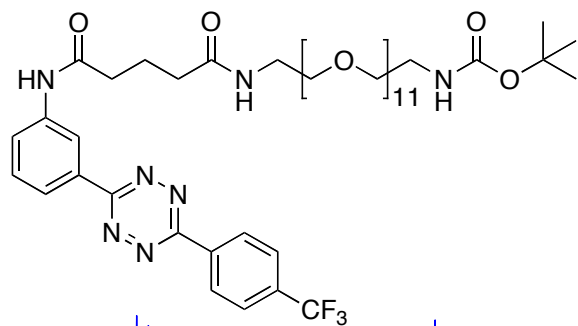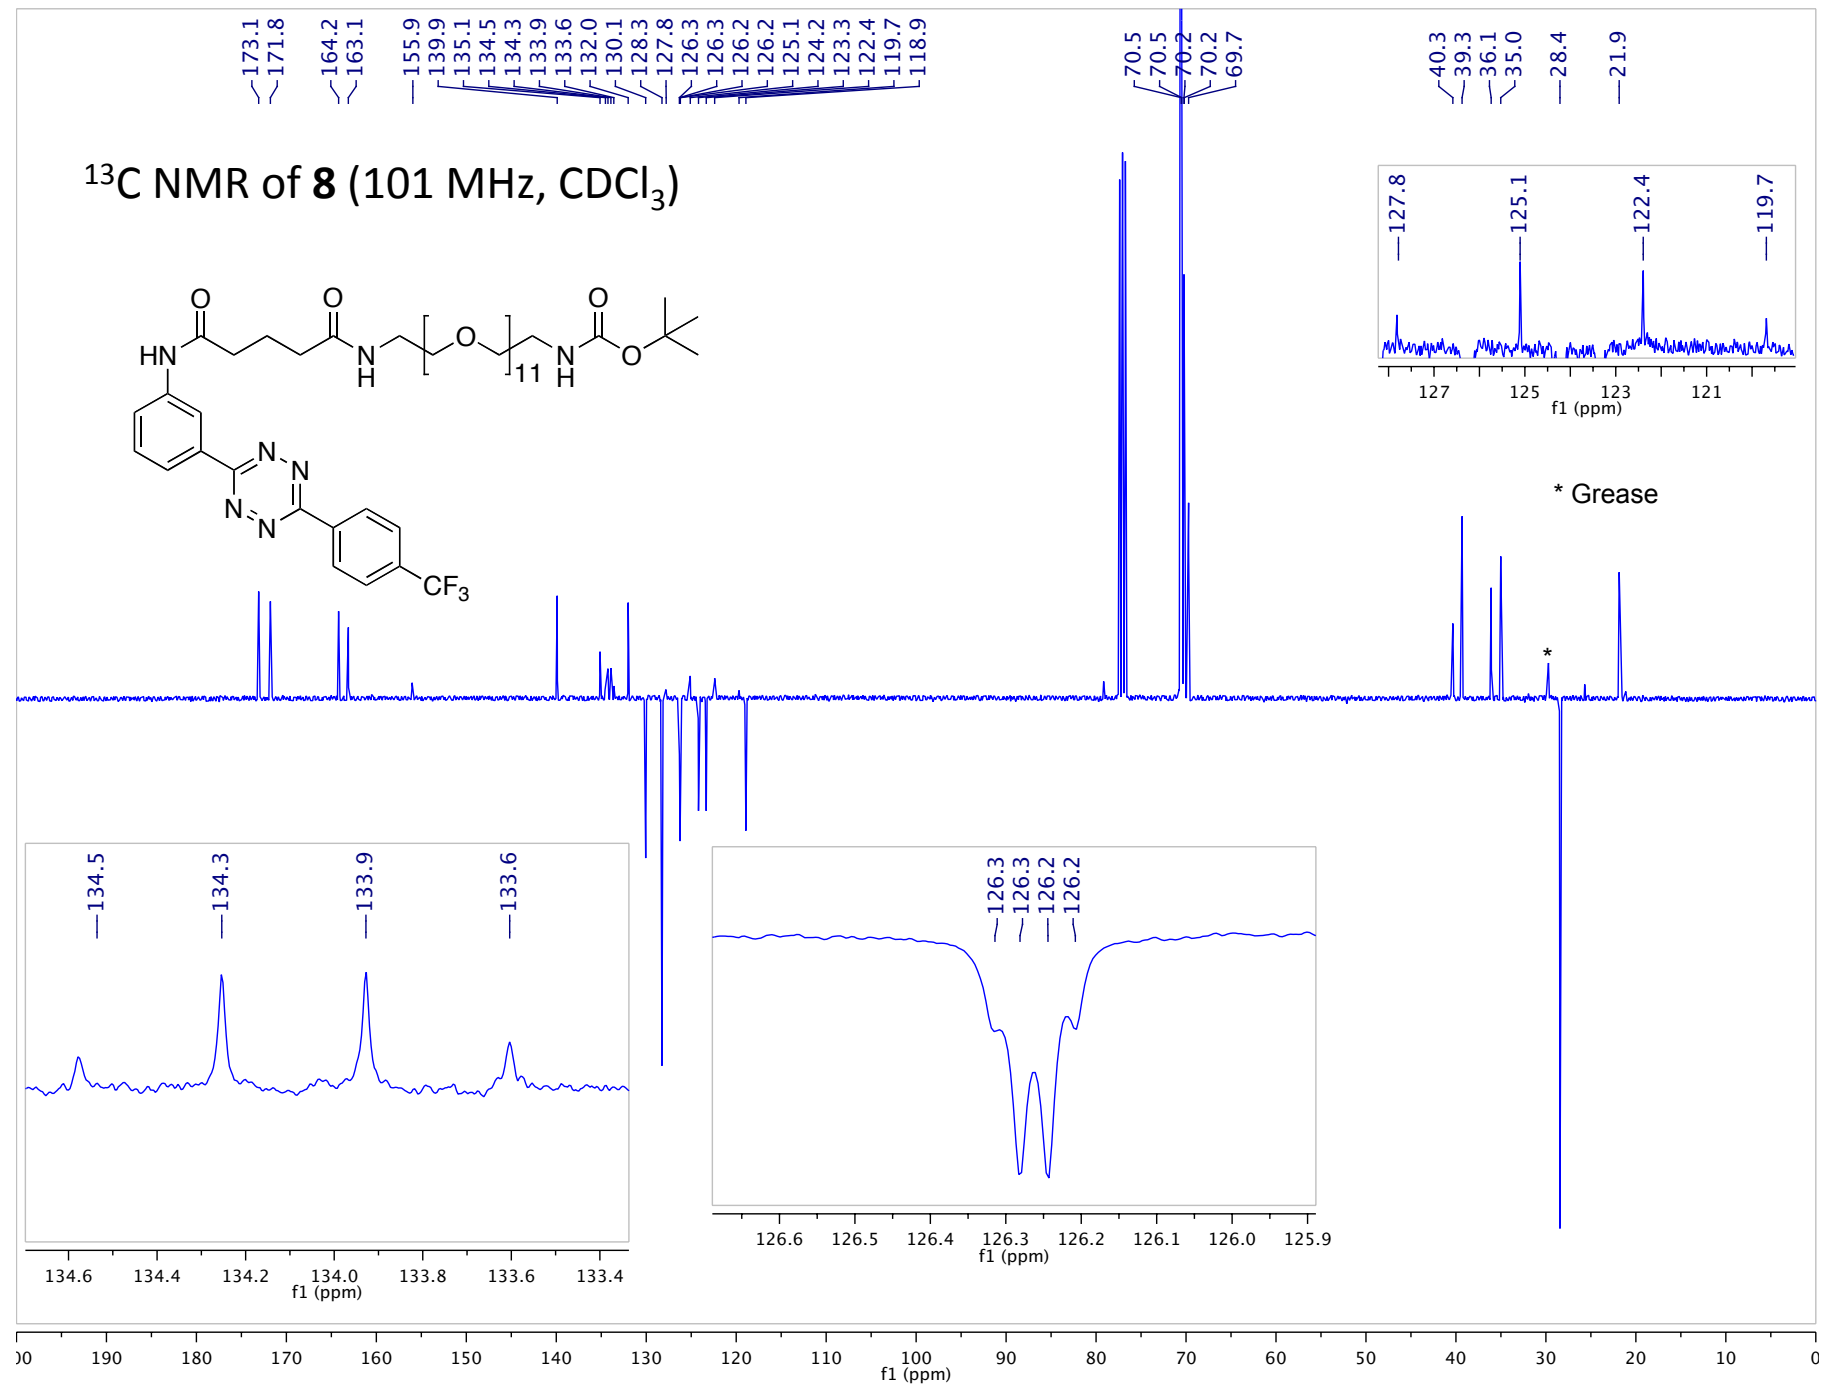

# HPLC of 7 (PDA Detection)

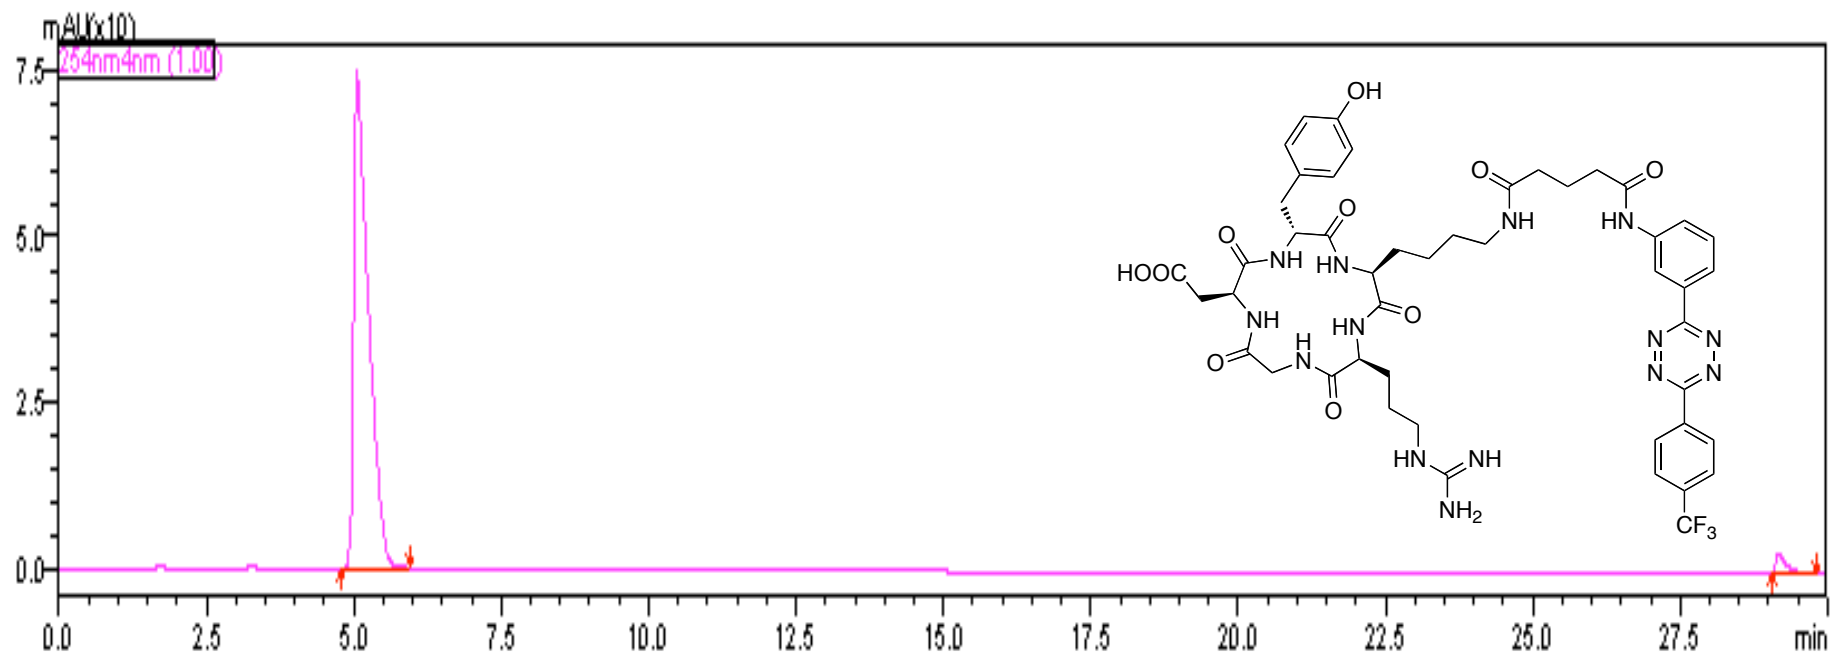

| Peak# | Ret. Time | Area    | Height | Area%   |
|-------|-----------|---------|--------|---------|
| 1     | 5.055     | 1275590 | 75000  | 97.958  |
| 2     | 29.164    | 26584   | 2571   | 2.042   |
| Total |           | 1302174 | 77571  | 100.000 |

# HRMS (ESI) of 7

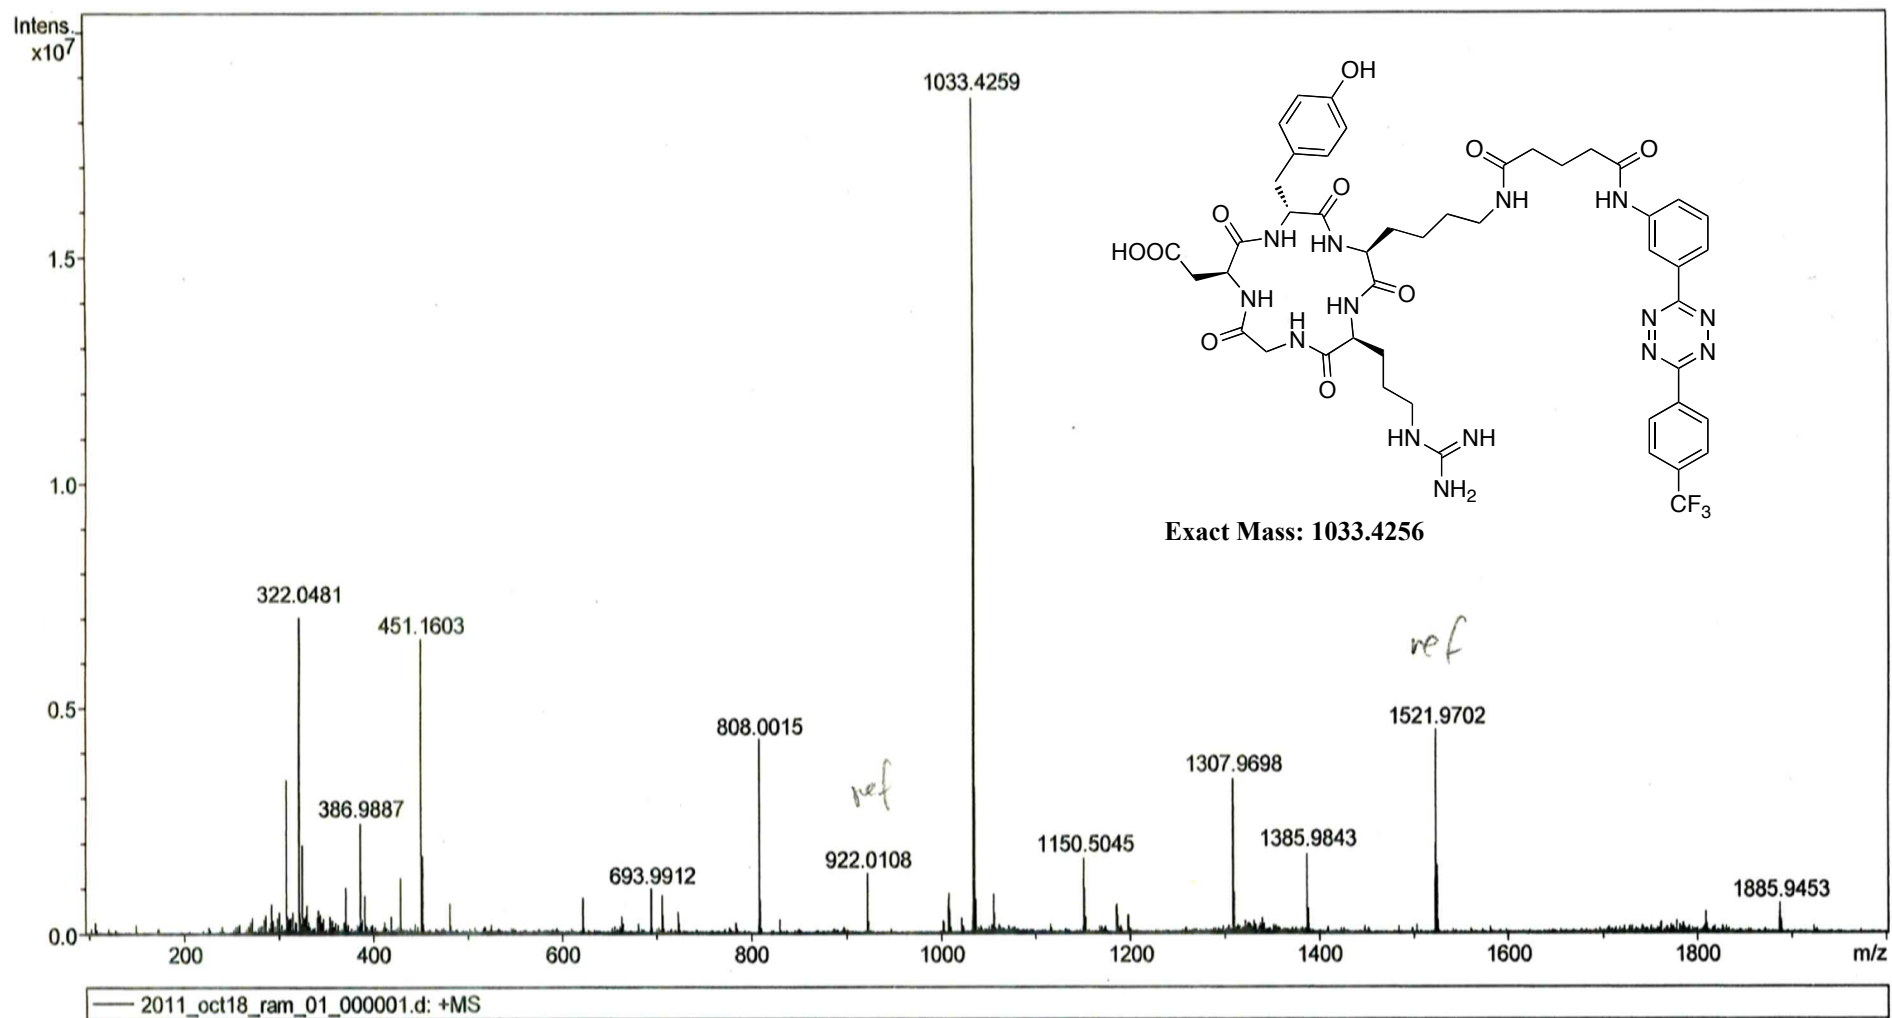

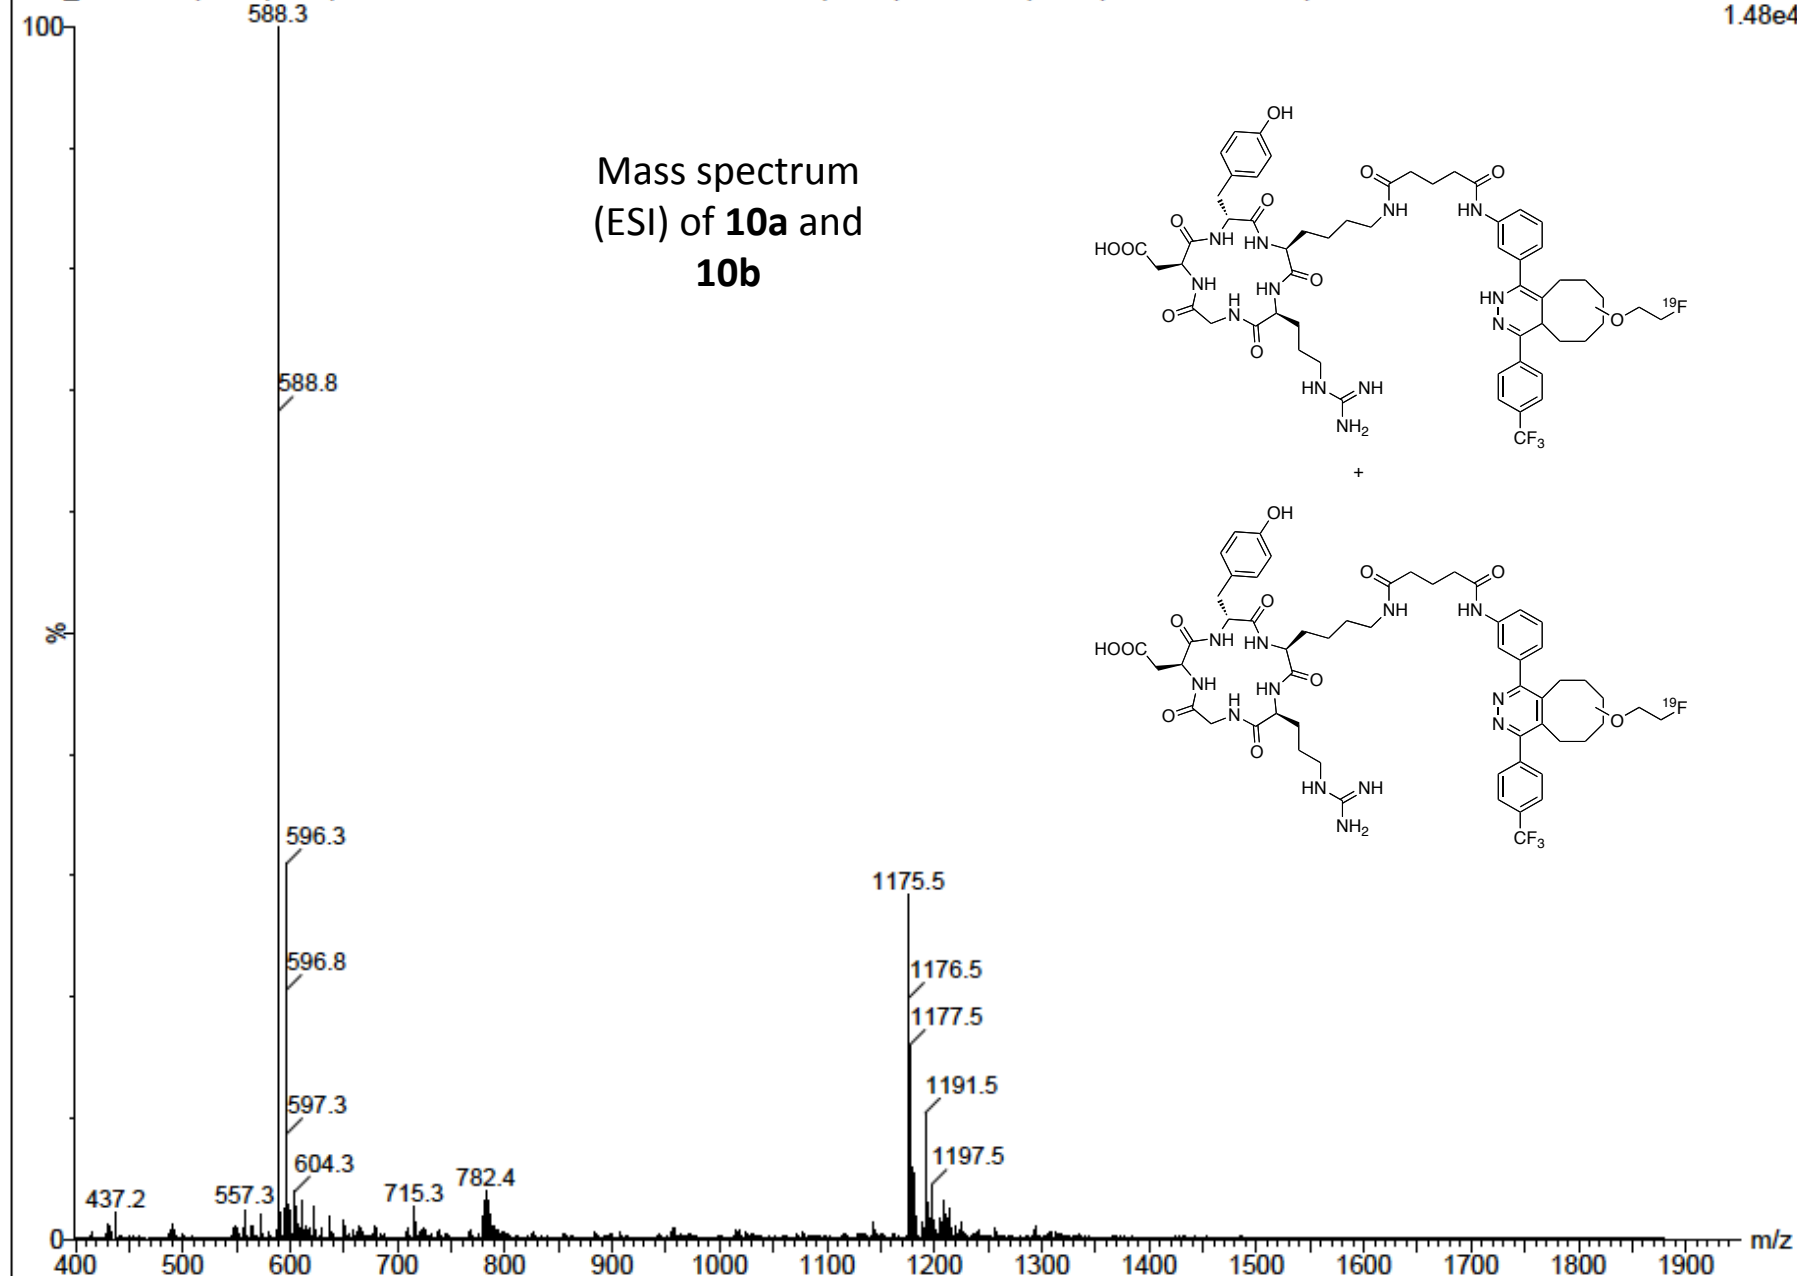

# High resolution mass spectrum (ESI) of **10a**

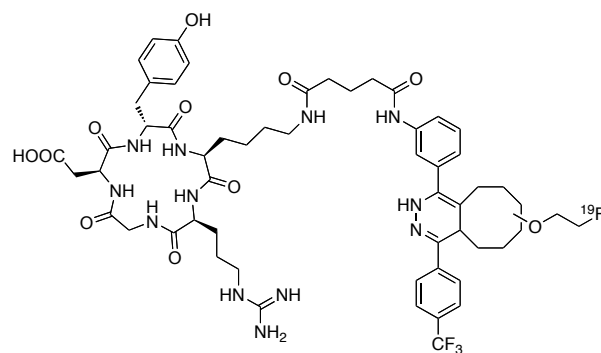

Monoisotopic Mass, Even Electron Ions

42 formula(e) evaluated with 2 results within limits (all results (up to 1000) for each mass)

Elements Used:

C: 0-150 H: 0-200 N: 12-12 O: 11-12 F: 4-4 Na: 0-1

David Boruta, CF3-TCO-RGD

University of Illinois, SCS, Mass Spectrometry Lab

Qtof\_39322 49 (2.078) AM (Cen,3, 80.00, Ar,15000.0,734.47,0.70,LS 3); Sm (SG, 2x3.00); Cm (48:54)

Q-tof UE521

1: TOF MS ES+

8.19e+002

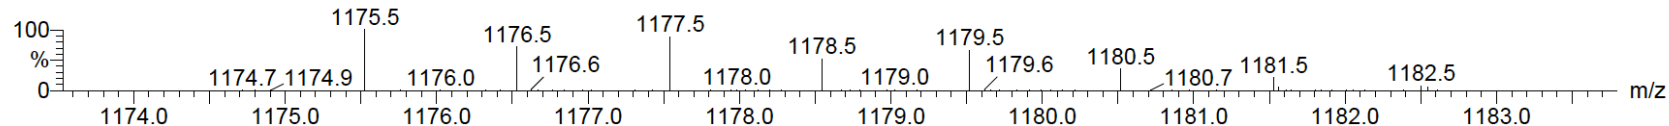

Minimum:

Maximum: 5.0 10.0 -1.5 150.0

| Mass      | Calc. Mass | mDa  | PPM  | DBE  | i-FIT | Formula               |
|-----------|------------|------|------|------|-------|-----------------------|
| 1177.5415 | 1177.5434  | -1.9 | -1.6 | 22.5 | 125.7 | C55 H74 N12 O11 F4 Na |
|           | 1177.5458  | -4.3 | -3.7 | 25.5 | 121.8 | C57 H73 N12 O11 F4    |

# High resolution mass spectrum (ESI) of **10b**

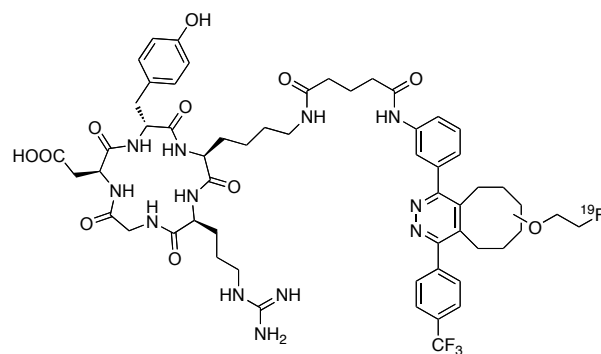

Monoisotopic Mass, Even Electron Ions

42 formula(e) evaluated with 2 results within limits (all results (up to 1000) for each mass)

Elements Used:

C: 0-150 H: 0-200 N: 12-12 O: 11-12 F: 4-4 Na: 0-1

David Boruta, CF3-TCO-RGD

University of Illinois, SCS, Mass Spectrometry Lab

Qtof\_39322 49 (2.078) AM (Cen,3, 80.00, Ar,15000.0,734.47,0.70,LS 3); Sm (SG, 2x3.00); Cm (48:54)

Q-tof UE521

1: TOF MS ES+

8.19e+002

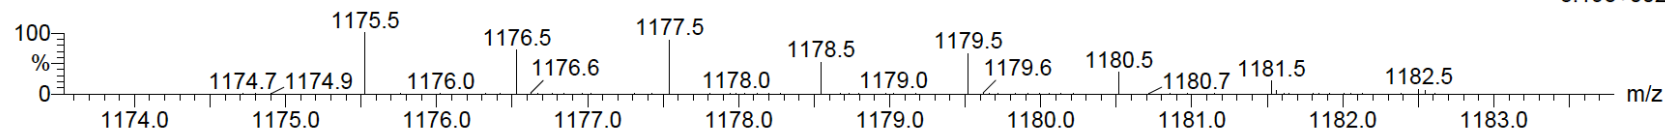

Minimum:

Maximum:

5.0

10.0

-1.5

150.0

Mass

Calc. Mass

mDa

PPM

DBE

i-FIT

Formula

1175.5267

1175.5277

-1.0

-0.9

23.5

179.9

C55 H72 N12 O11 F4 Na

1175.5301

-3.4

-2.9

26.5

172.0

C57 H71 N12 O11 F4
